# Supplementary material
Source: PubMed Central journal article supplement (PMC9116041)
Supplement: mmc1.pdf [file mmc1.pdf]

## **Consenso sobre el manejo del paciente con EPOC en el entorno de la COVID-19: Grupo de trabajo EPOC Forum**

Myriam Calle Rubio<sup>1</sup>, José Luis López-Campos<sup>2</sup>, José Luis Izquierdo Alonso<sup>3</sup>, Dolores Martínez Pitarch<sup>4</sup>, Milagros Iriberry Pascual<sup>5</sup>, Bernardino Alcázar Navarrete<sup>6</sup>, Manuel Valle Falcones<sup>7</sup>, María Jesús Avilés Inglés<sup>8</sup>, Carlos Cabrera López<sup>9</sup>, Carlos José Álvarez Martínez<sup>10</sup>, Francisco Ortega Ruiz<sup>11</sup>, Rafael Golpe<sup>12</sup>, Antònia Fuster Gomila<sup>13</sup>, Sergi Pascual Guardia<sup>14</sup>, Juan Antonio Riesco Miranda<sup>15</sup>, Germán Peces-Barba<sup>16</sup>, Francisco García-Río<sup>17</sup>, Manuel Ángel Martínez Muñoz<sup>18</sup>, Borja G. Cosío<sup>19</sup>

<sup>1</sup>Servicio de Neumología, Instituto de Investigación (IdISSC), Hospital Clínico San Carlos. Departamento de Medicina, Facultad de Medicina, Universidad Complutense de Madrid. Madrid. [mcallerubio@gmail.com](mailto:mcallerubio@gmail.com)

<sup>2</sup>Unidad Médico-Quirúrgica de Enfermedades Respiratorias. Instituto de Biomedicina de Sevilla (IBiS). Hospital Universitario Virgen del Rocío/Universidad de Sevilla. Sevilla; Centro de Investigación Biomédica en Red de Enfermedades Respiratorias (CIBERES). Instituto de Salud Carlos III. Madrid. [lopezcampos@separ.es](mailto:lopezcampos@separ.es)

<sup>3</sup>Departamento de Medicina y Especialidades. Universidad de Alcalá. Hospital Universitario de Guadalajara. Guadalajara. [joseluis.izquierdoa@uah.es](mailto:joseluis.izquierdoa@uah.es)

<sup>4</sup>Hospital Lluís Alcanyis. Xàtiva. Valencia. [lolapitarch@hotmail.com](mailto:lolapitarch@hotmail.com)

<sup>5</sup>Hospital Universitario de Cruces. Bilbao. [mariamilagros.iberripascual@osakidetza.eus](mailto:mariamilagros.iberripascual@osakidetza.eus)

<sup>5</sup>Servicio de Neumología. AIG de Medicina. Hospital de Alta Resolución de Loja. Granada. Centro de Investigación Biomédica en Red de Enfermedades Respiratorias (CIBERES). Instituto de Salud Carlos III. Madrid. [balcazarnavarrete@gmail.com](mailto:balcazarnavarrete@gmail.com)

<sup>7</sup>Hospital Universitario Puerta de Hierro-Majadahonda. Madrid. [rycmvalle@hotmail.com](mailto:rycmvalle@hotmail.com)

<sup>8</sup>Hospital General Universitario Reina Sofía. Murcia. [mjavilesingles@gmail.com](mailto:mjavilesingles@gmail.com)

<sup>9</sup>Hospital Universitario de Gran Canaria Doctor Negrín. Las Palmas de Gran Canaria. Las Palmas. [ccablopn@gmail.com](mailto:ccablopn@gmail.com)

<sup>10</sup>Hospital Universitario 12 de Octubre. Madrid. [carlosjose.alvarez@salud.madrid.org](mailto:carlosjose.alvarez@salud.madrid.org)

<sup>11</sup>Unidad Médico-Quirúrgica de Enfermedades Respiratorias. Instituto de Biomedicina de Sevilla (IBiS). Hospital Universitario Virgen del Rocío/Universidad de Sevilla. Sevilla; Centro de Investigación Biomédica en Red de Enfermedades Respiratorias (CIBERES). Instituto de Salud Carlos III. Madrid. [francisco.ortega.sspa@juntadeandalucia.es](mailto:francisco.ortega.sspa@juntadeandalucia.es)

<sup>12</sup>Hospital Universitario Lucus Augusti. Lugo. [rafagolpe@gmail.com](mailto:rafagolpe@gmail.com)

<sup>13</sup>Hospital Son Llàtzer. Palma de Mallorca. [antoniafustergomila@yahoo.es](mailto:antoniafustergomila@yahoo.es)

<sup>14</sup>Hospital del Mar. Barcelona. [spascual@parcdesalutmar.cat](mailto:spascual@parcdesalutmar.cat)

<sup>15</sup>Hospital San Pedro de Alcántara. Cáceres. [jantonio.riesco@gmail.com](mailto:jantonio.riesco@gmail.com)

<sup>16</sup>Hospital Universitario Fundación Jiménez Díaz. Centro de Investigación Biomédica en Red de Enfermedades Respiratorias (CIBERES). Instituto de Salud Carlos III. Madrid. [gpeces@fjd.es](mailto:gpeces@fjd.es)

<sup>17</sup>Hospital Universitario La Paz. Madrid. Centro de Investigación Biomédica en Red en Enfermedades Respiratorias (CIBERES). Universidad Autónoma de Madrid. Madrid. [fgrio@salud.madrid.org](mailto:fgrio@salud.madrid.org)

<sup>18</sup>Hospital Universitario San Agustín. Avilés. [manumam79@gmail.com](mailto:manumam79@gmail.com)

<sup>19</sup>Hospital Universitario Son Espases-IdISBa-CIBERES. Palma de Mallorca.  
[borja.cosio@ssib.es](mailto:borja.cosio@ssib.es)

#### **AUTOR PARA LA CORRESPONDENCIA:**

Borja G. Cosío

Hospital Universitario Son Espases

Carretera de Valldemossa, 79 - 07120 Palma, Illes Balears (España)

e-mail: [borja.cosio@ssib.es](mailto:borja.cosio@ssib.es)

#### **AGRADECIMIENTOS**

Los autores quieren agradecer a Fernando Sánchez Barbero PhD y Luzán 5 Health Consulting por su ayuda en la preparación del manuscrito.

#### **FINANCIACIÓN**

El presente trabajo ha sido financiado por Chiesi.

#### **CONFLICTOS DE INTERÉS**

MCR ha recibido honorarios de Boehringer Ingelheim, AstraZeneca, Grifols, GlaxoSmithKline, Chiesi, Menarini y Novartis. No tiene conflicto de intereses real o percibido entre todas estas fuentes y el presente documento.

JLLC ha recibido honorarios durante los últimos 3 años por dar conferencias, asesoramiento científico, participar en estudios clínicos o escribir para publicaciones para (por orden alfabético) AstraZeneca, Bial, Boehringer Ingelheim, Chiesi, CSL Behring, Ferrer, Gebro, GlaxoSmithKline, Grifols, Menarini, Megalabs, Novartis y Rovi.

JLIA ha recibido honorarios por asesoramiento, proyectos o ponencias de AstraZeneca, Bayer, Boehringer Ingelheim, Chiesi, GlaxoSmithKline, Grifols, Menarini, Novartis, Orion, Pfizer, Sandoz y Teva.

DMP ha recibido honorarios como ponente de AstraZeneca, Boehringer Ingelheim, Chiesi, Ferrer, FAES, GlaxoSmithKline, Orion Pharma y Sanofi.

MIP no tiene ningún conflicto de interés.

BAN ha recibido honorarios y/o pagos en los últimos cinco años de AstraZeneca, Boehringer Ingelheim, Chiesi, FAES, GlaxoSmithKline, Menarini y Novartis.

MVF ha colaborado en la realización de ponencias y formación con AstraZeneca, Boehringer Ingelheim, Chiesi y GlaxoSmithKline.

MJAI no tiene ningún conflicto de interés.

CCL no tiene ningún conflicto de interés.

CJAM no tiene ningún conflicto de interés.

FOR no tiene ningún conflicto de interés.

RG ha recibido pagos por conferencias o participación en grupos consultivos, o ayuda económica para participar en congresos, de AstraZeneca, GlaxoSmithKline, Novartis, Chiesi, Mundipharma, Menarini, Teva, Grifols, Ferrer, Boehringer Ingelheim, Rovi y Gebro.

AFG no tiene ningún conflicto de interés.

SPG ha recibido en el último año remuneración económica por la impartición de sesiones docentes dirigidas a atención primaria por parte de GlaxoSmithKline.

JARM ha recibido honorarios por asesoría científica y/o por impartir conferencias de Aflofarm, AstraZeneca, Bial, Boehringer Ingelheim, Chiesi, GlaxoSmithKline, Menarini, Mundipharma, Novartis, Pfizer, Rovi y Teva.

GPB ha recibido ayudas de investigación por vía institucional de GlaxoSmithKline, Boehringer Ingelheim, Chiesi y Menarini; y ha realizado tareas de asesoría científica a GlaxoSmithKline y Orion Pharma.

FGR ha recibido financiación por ponencias de Boehringer Ingelheim, Pfizer, Chiesi, GlaxoSmithKline, Menarini, Novartis y Rovi, y honorarios por consultoría de Boehringer Ingelheim, Pfizer, GlaxoSmithKline y Novartis.

MAMM ha recibido honorarios por participación en ensayos clínicos, ponencias, conferencias y cursos patrocinados por: AstraZeneca, Boehringer Ingelheim, Chiesi, GlaxoSmithKline, Menarini, Novartis y Pfizer.

BGC declara haber recibido ayudas para asistir a congresos, honorarios por conferencias o asesorías científicas de AstraZeneca, GlaxoSmithKline, Novartis, Chiesi, Sanofi, Menarini, Teva, Boehringer Ingelheim y Rovi.

*Estimado Director:*

Desde el inicio de la pandemia producida por el virus SARS-CoV-2, causante de la COVID-19, se han desarrollado numerosos planes estratégicos y posicionamiento de las diferentes sociedades médicas para la prevención y manejo de la enfermedad pulmonar obstructiva crónica (EPOC)<sup>1-6</sup>. Sin embargo, la realidad dista mucho de ser óptima. Aunque se ha aprendido mucho durante los momentos más duros de la pandemia, muchos aspectos sobre el diagnóstico, tratamiento y seguimiento de estos pacientes aún resultan controvertidos y generan dudas entre los profesionales sanitarios<sup>7</sup>. Por este motivo, y con el objetivo de conocer la opinión de expertos en EPOC sobre cuestiones controvertidas del manejo de la enfermedad durante la pandemia de la COVID-19, se ha desarrollado un consenso siguiendo una metodología Delphi<sup>8</sup>.

El proyecto lo constituyó un comité científico de 19 neumólogos expertos en EPOC. Este comité analizó la evidencia científica sobre 4 temas: diagnóstico, seguimiento, tratamiento y exacerbaciones de la EPOC durante la pandemia de la COVID-19. Posteriormente, esta evidencia fue discutida en 15 sesiones de debate a las que se invitó a 8 neumólogos asistenciales en cada una. Con la información obtenida en estas reuniones se desarrolló un cuestionario de 61 aseveraciones (tabla 1) que fue enviado a un panel de 106 neumólogos con experiencia en EPOC para que mostraran su grado de acuerdo según una escala Likert de 1 a 9. Se consideraron consensuadas aquellas aseveraciones puntuadas en la región 1-3 (desacuerdo, mediana  $\leq 3$ ) o 7-9 (acuerdo, mediana  $\geq 7$ ) por más del 66,6% de los panelistas. Cuando más del 66,6% puntuaron una aseveración en la región 4-6, se consideró no consensuada.

Tras dos rondas consecutivas, se alcanzó el consenso en 44 aseveraciones (72,1%): 40 en el acuerdo (65,6%) y 4 en el desacuerdo (6,6%). Quedaron sin consensuar 17 aseveraciones (27,9%). En la tabla 1 se muestran las puntuaciones y el grado de acuerdo para cada aseveración.

De las 17 aseveraciones relativas al diagnóstico, 11 fueron consensuadas en el acuerdo y 2 en el desacuerdo. Los panelistas consideraron importante tomar las precauciones necesarias para evitar la transmisión del virus, como el uso de EPI, mascarillas FFP2 y pantallas de protección facial, incluso aunque el personal sanitario esté vacunado, extremando la limpieza y desinfección de los laboratorios y todo el material utilizado. A pesar de la situación de pandemia, la gran mayoría consideró que la espirometría es esencial para el diagnóstico y no puede sustituirse por otro método. Sin embargo, para descargar la presión asistencial, los panelistas consensuaron que se puede priorizar a pacientes con exacerbaciones frecuentes, realizando el seguimiento de los pacientes estables con el registro de síntomas y exacerbaciones. Se mostraron de acuerdo en que las limitaciones que ha habido durante la pandemia han originado infradiagnósticos o diagnósticos erróneos de la EPOC, lo que ha conducido a iniciar tratamientos sin valoración funcional.

De las 16 aseveraciones sobre el seguimiento, 11 fueron consensuadas en el acuerdo y el resto no fueron consensuadas. Se consensó en el acuerdo la utilidad de las consultas no presenciales durante la pandemia, sobre todo en pacientes con EPOC poco complejos o pacientes frágiles con dificultades o que no desean desplazarse a los centros sanitarios. También se consensó que las consultas deberían poder contar con soporte visual (no solo telefónico) y en ellas se debería poder medir, al menos, la saturación de oxígeno y el cuestionario de evaluación de la EPOC (*CAT, COPD Assessment Test*). Asimismo, las consultas no presenciales deben hacerse principalmente por los médicos. El personal de Enfermería intervendría preferentemente en casos leves o pacientes frágiles (estos últimos por la necesidad de un seguimiento más continuado). Aun así, se consideró que lo más recomendable es que las consultas iniciales sean presenciales, incluso a pesar del contexto de pandemia, ya que ofrecen una atención de mayor calidad que las no presenciales.

De las 19 aseveraciones sobre el tratamiento de la EPOC, 11 alcanzaron un consenso en el acuerdo y 2 en el desacuerdo. Se consensuó en el acuerdo que se deben mantener los objetivos del tratamiento de la EPOC a pesar de haber sufrido una infección por el SARS-CoV-2, manteniendo el tratamiento broncodilatador usado antes de la infección, priorizando el mantenimiento de la actividad física y facilitando acceso al tratamiento antitabáquico. Los panelistas se mostraron en desacuerdo en contraindicar los glucocorticoides inhalados a los pacientes con EPOC e infección por SARS-CoV-2 con antecedentes de neumonía. También se consensuó en el acuerdo que un ingreso hospitalario por COVID-19 debe considerarse como una exacerbación grave y que debe establecerse un programa de rehabilitación en aquellos pacientes con EPOC ingresados por COVID-19, así como hacer una búsqueda activa de cuadros de ansiedad, depresión y comorbilidades cardiovasculares u otras no asociadas con la EPOC y sí a la infección. Aunque con un escaso grado de acuerdo, se consensuó establecer profilaxis antitrombótica solo en pacientes con EPOC y COVID-19 que han precisado ingreso hospitalario.

Finalmente, de las 9 aseveraciones relativas a las exacerbaciones, 7 fueron consensuadas en el acuerdo. Los panelistas consensuaron en el acuerdo que la telemonitorización domiciliar de exacerbaciones debe iniciarse tras sufrir una grave y debe incluir los resultados de la escala de disnea modificada del *Medical Research Council* (MMRC), los datos de saturación de oxígeno, el registro actividad física y de uso de medicación de rescate e información sobre el color del esputo. No se consensuó el incluir los resultados diarios del *peak flow*. Aunque se consensuó en el acuerdo que las alarmas de telemonitorización deben ser atendidas por el personal de Enfermería Especializada, no se consensuó el que sean atendidas por un médico.

La presente metodología Delphi pone de manifiesto de qué forma se enfrentan los panelistas ante el manejo de los pacientes con EPOC durante la pandemia de la COVID-

19. Aunque aún persisten aspectos controvertidos, el alto grado de acuerdo alcanzado muestra algunos mensajes clave que deberían tenerse en cuenta en las recomendaciones sobre el manejo de estos pacientes durante la pandemia, entre las que se podrían destacar la importancia de las medidas de protección y seguridad, el empleo de la espirometría en el diagnóstico, el uso de visitas no presenciales como complemento y no sustitución de las presenciales, el mantener los objetivos terapéuticos a pesar de la infección por el virus y el uso de la telemonitorización domiciliaria para prevenir y controlar las exacerbaciones.

## BIBLIOGRAFÍA

1. Halpin DMG, Criner GJ, Papi A, Singh D, Anzueto A, Martínez FJ, et al. Global Initiative for the Diagnosis, Management, and Prevention of Chronic Obstructive Lung Disease. The 2020 GOLD Science Committee Report on COVID-19 and Chronic Obstructive Pulmonary Disease. *Am J Respir Crit Care Med*. 2021;203:24-36.
2. Franczuk M, Przybylowski T, Czajkowska-Malinowska M, Radlinski J, Bochenek G, Wesolowski S, et al. Spirometry during the SARS-CoV-2 pandemic. Guidelines and practical advice from the expert panel of Respiratory Physiopathology Assembly of Polish Respiratory Society. *Adv Respir Med*. 2020;88:640-50.
3. Sociedad Española de Neumología y Cirugía Torácica. Recomendaciones sobre prevención de contagio por coronavirus en unidades de Función Pulmonar de los diferentes ámbitos asistenciales. [consultado 21 enero 2022]; Disponible en: <https://www.separ.es/node/1773>.
4. American Thoracic Society. Pulmonary Function Laboratories: Advice Regarding COVID-19. [consultado 21 enero 2022]; Disponible en: <https://www.thoracic.org/professionals/clinical-resources/disease-related-resources/pulmonary-function-laboratories.php>.
5. European Respiratory Society. COVID-19: Guidelines and recommendations directory. [consultado 21 enero 2022]; Disponible en: <https://www.ersnet.org/covid-19/covid-19-guidelines-and-recommendations-directory/>.
6. Kouri A, Gupta S, Yadollahi A, Ryan CM, Gershon AS, To T, et al. Addressing reduced laboratory-based pulmonary function testing during a pandemic. *Chest*. 2020;158:2502-10.
7. Burgos Rincón F, Martínez Llorens J, Cordovilla Pérez R. Impact of the COVID-19 pandemic on lung function laboratories: Considerations for "today" and the "day after". *Arch Bronconeumol*. 2020;56:611-2.

8. Hasson F, Keeney S, McKenna H. Research guidelines for the Delphi survey technique. J Adv Nurs. 2000;32:1008-15.

**Tabla 1.** Resultados obtenidos por el panel de expertos tras dos rondas de consultas

|                                                                                                                                                                                                        | Mediana<br>(IIQ) | %<br>desacuerdo | %<br>acuerdo |
|--------------------------------------------------------------------------------------------------------------------------------------------------------------------------------------------------------|------------------|-----------------|--------------|
| <b>Diagnóstico</b>                                                                                                                                                                                     |                  |                 |              |
| 1. En situación de pandemia con alto nivel de incidencia, es necesaria la realización previa de PCR en todos los pacientes que vayan a realizar pruebas de función respiratoria.                       | 8 (4)            | 16,7            | 66,7         |
| 2. Con bajo nivel de incidencia, el uso de EPI, la realización de un cuestionario rápido y la toma de temperatura de los pacientes, son suficientes para realizar las pruebas de función respiratoria. | 8 (3)            | 8,54            | 75,2         |
| 3. En situación de pandemia, el personal sanitario presente en la realización de pruebas de función respiratoria debe utilizar EPI de forma obligatoria.                                               | 8 (3)            | 6,0             | 71,8         |
| 4. Durante la pandemia, el uso de mascarilla FFP2 y pantalla de protección facial son medidas de seguridad suficientes para la realización de pruebas de función respiratoria.                         | 8 (4)            | 20,4            | 68,5         |
| 5. En situación de pandemia, con el personal sanitario vacunado, es innecesaria la utilización de EPI en las pruebas de función respiratoria.                                                          | 1 (3)            | 71,3            | 11,1         |
| 6. En situación de pandemia, se debe realizar una consulta telefónica previa a la realización de pruebas de función pulmonar para detectar una posible infección por SARS-CoV-2.                       | 5 (4)            | 44,5            | 39,8         |
| 7. En situación de pandemia, se debe realizar desinfección del material tras cada prueba de función pulmonar.                                                                                          | 9 (1)            | 2,6             | 94,9         |
| 8. Desde el inicio de la pandemia, es necesario adaptar los protocolos de limpieza en los laboratorios de función respiratoria debido a la transmisión aérea del SARS-CoV-2.                           | 9 (1)            | 0,0             | 98,3         |
| 9. En situación de pandemia, se deben limitar las espirometrías al momento del diagnóstico.                                                                                                            | 5 (4)            | 46,3            | 34,3         |
| 10. En situación de pandemia, se deben priorizar las espirometrías de seguimiento en aquellos pacientes con exacerbaciones frecuentes.                                                                 | 8 (2)            | 7,4             | 73,1         |
| 11. En situación de pandemia, el control clínico de los pacientes con EPOC estable se debe hacer mediante el registro de síntomas y exacerbaciones.                                                    | 8 (3)            | 6,0             | 72,7         |
| 12. Las limitaciones en la realización de pruebas de función pulmonar debidas a la pandemia han originado un infradiagnóstico de la EPOC.                                                              | 8 (2)            | 0,9             | 85,5         |
| 13. La situación de pandemia ha incrementado los diagnósticos erróneos de EPOC, iniciando tratamientos sin valoración funcional.                                                                       | 7 (2)            | 6,0             | 71,8         |

|                                                                                                                                                                                      |       |      |      |
|--------------------------------------------------------------------------------------------------------------------------------------------------------------------------------------|-------|------|------|
| 14. La espirometría es necesaria para el diagnóstico de la EPOC y no puede sustituirse con otros métodos.                                                                            | 9 (1) | 0,9  | 91,5 |
| 15. El diagnóstico de EPOC en Atención Primaria puede realizarse con otros métodos distintos a la espirometría, como los cuestionarios clínicos o la medición con <i>peak flow</i> . | 1 (2) | 73,2 | 7,4  |
| 16. En el escenario de pandemia, la medida del índice FEV1/FEV6 con dispositivos portátiles es una alternativa a la espirometría convencional.                                       | 7 (2) | 13,0 | 57,4 |
| 17. En el escenario de pandemia, la alternativa a la espirometría convencional es la telespirometría.                                                                                | 6 (2) | 16,7 | 46,3 |
| <b>Seguimiento</b>                                                                                                                                                                   |       |      |      |
| 18. La consulta no presencial es viable para el seguimiento de los pacientes con EPOC si la infraestructura está adaptada a este procedimiento.                                      | 7 (2) | 12,0 | 70,1 |
| 19. La presencialidad es indispensable en la consulta de seguimiento de los pacientes con EPOC.                                                                                      | 3 (2) | 50,9 | 18,5 |
| 20. La consulta no presencial es una alternativa útil en el seguimiento de pacientes con EPOC poco complejos.                                                                        | 8 (2) | 1,7  | 90,6 |
| 21. La consulta no presencial es una alternativa útil en el seguimiento de pacientes frágiles que prefieren no acudir al hospital.                                                   | 7 (1) | 4,6  | 85,2 |
| 22. La consulta no presencial es una alternativa útil si cuenta con soporte audiovisual, no solo telefónico.                                                                         | 7 (2) | 7,4  | 75,0 |
| 23. La consulta no presencial ofrece una atención de menor calidad que la consulta presencial en el seguimiento de los pacientes con EPOC.                                           | 7 (2) | 7,4  | 75,9 |
| 24. La consulta presencial es más eficaz que la no presencial en la prevención de exacerbaciones.                                                                                    | 6 (3) | 23,2 | 50,0 |
| 25. La consulta no presencial en el seguimiento de los pacientes con EPOC debe poder medir al menos la saturación de oxígeno.                                                        | 7 (3) | 8,5  | 69,2 |
| 26. La consulta no presencial en el seguimiento de los pacientes con EPOC debe incluir los resultados del CAT.                                                                       | 7 (2) | 9,4  | 70,1 |
| 27. La consulta no presencial, como complemento en el seguimiento de la EPOC, debe ser realizada por profesionales de Enfermería especializados.                                     | 6 (3) | 19,4 | 47,2 |
| 28. La consulta no presencial, como alternativa en el seguimiento de la EPOC, debe ser realizada por médicos.                                                                        | 8 (3) | 0,9  | 74,4 |
| 29. La consulta no presencial de Enfermería especializada está indicada en el seguimiento de los pacientes frágiles con EPOC.                                                        | 7 (4) | 22,2 | 66,7 |
| 30. La consulta no presencial de Enfermería especializada está indicada en el seguimiento de los pacientes con EPOC leve.                                                            | 7 (4) | 20,4 | 66,7 |

|                                                                                                                                                                                           |       |      |      |
|-------------------------------------------------------------------------------------------------------------------------------------------------------------------------------------------|-------|------|------|
| 31. La consulta no presencial de Enfermería especializada está indicada en el seguimiento de los pacientes con EPOC y exacerbaciones frecuentes.                                          | 5 (6) | 45,4 | 48,2 |
| 32. A pesar de la situación de pandemia, la consulta inicial de los pacientes con EPOC debe ser siempre presencial.                                                                       | 8 (3) | 14,5 | 70,9 |
| 33. En situación de pandemia, las consultas de seguimiento de los pacientes con EPOC deben ser a demanda.                                                                                 | 4 (4) | 48,2 | 31,5 |
| <b>Tratamiento</b>                                                                                                                                                                        |       |      |      |
| 34. En los pacientes que han sufrido infección por SARS-CoV-2 se deben mantener los objetivos de tratamiento de la EPOC.                                                                  | 9 (1) | 0,0  | 96,6 |
| 35. En situación de pandemia, se debe priorizar el mantenimiento de la actividad física en los pacientes con EPOC, limitada por las restricciones de movilidad.                           | 8 (1) | 0,0  | 96,6 |
| 36. En los pacientes con EPOC, que han sufrido infección por SARS-CoV-2, se deben replantear los objetivos del tratamiento por las secuelas de la infección.                              | 6 (5) | 31,5 | 44,4 |
| 37. La baja incidencia de infección por SARS-CoV-2 en los pacientes con EPOC se ha debido a su mayor cumplimiento de las medidas de aislamiento.                                          | 8 (1) | 0,9  | 88,0 |
| 38. La situación de pandemia ha aumentado la prevalencia de tabaquismo en la población.                                                                                                   | 6 (2) | 4,6  | 41,7 |
| 39. En situación de pandemia, se debe facilitar el acceso al tratamiento antitabáquico a los pacientes con EPOC, ya que constituye un factor de riesgo de infección grave por SARS-CoV-2. | 8 (2) | 1,7  | 76,9 |
| 40. En el escenario de pandemia, la intervención sobre el tabaquismo a corto plazo es irrelevante como medida de prevención.                                                              | 2 (4) | 70,1 | 12,0 |
| 41. En los pacientes con EPOC que han pasado una infección por SARS-CoV-2 se debe mantener el tratamiento broncodilatador previo a la infección.                                          | 8 (2) | 3,4  | 86,3 |
| 42. Es recomendable incorporar GCI en el tratamiento de los pacientes con EPOC con infección por SARS-CoV-2.                                                                              | 5 (2) | 26,9 | 18,5 |
| 43. Los GCI deben incorporarse al tratamiento de los pacientes con EPOC que han tenido ingreso por infección grave por SARS-CoV-2.                                                        | 5 (3) | 27,8 | 18,5 |
| 44. Los GCI están contraindicados en los pacientes con EPOC e infección por SARS-CoV-2 que presentan antecedentes de neumonías.                                                           | 2 (2) | 73,1 | 4,6  |
| 45. En los pacientes con EPOC, el ingreso hospitalario por COVID-19 debe considerarse, a todos los efectos, como una exacerbación grave.                                                  | 8 (1) | 10,2 | 77,8 |
| 46. En los pacientes con EPOC que han pasado una infección por SARS-CoV-2, un programa de                                                                                                 | 9 (1) | 0,0  | 98,3 |

|                                                                                                                                                                                                      |       |      |      |
|------------------------------------------------------------------------------------------------------------------------------------------------------------------------------------------------------|-------|------|------|
| rehabilitación es recomendable en aquellos que han precisado ingreso hospitalario prolongado.                                                                                                        |       |      |      |
| 47. En los pacientes con EPOC que han pasado una infección por SARS-CoV-2 se debe hacer una búsqueda activa de cuadros de ansiedad y depresión.                                                      | 8 (2) | 1,7  | 81,2 |
| 48. En los pacientes con EPOC que han pasado una infección por SARS-CoV-2 se debe hacer una búsqueda activa de las comorbilidades cardiovasculares.                                                  | 8 (2) | 2,6  | 81,2 |
| 49. En los pacientes con EPOC que han pasado una infección por SARS-CoV-2 se debe hacer una búsqueda activa de comorbilidades no habitualmente asociadas a la EPOC, y que se asocian a la infección. | 7 (1) | 2,6  | 76,1 |
| 50. En los pacientes con EPOC e infección por SARS-CoV-2 se debe realizar siempre tratamiento antitrombótico.                                                                                        | 5 (4) | 42,6 | 30,6 |
| 51. Se debe establecer profilaxis antitrombótica solo en aquellos pacientes con EPOC e infección por SARS-CoV-2 que han sufrido ingreso hospitalario.                                                | 7 (5) | 20,4 | 66,7 |
| 52. Los pacientes con EPOC e infección por SARS-CoV-2 deben ingresar preferentemente en unidades de cuidados respiratorios intermedios.                                                              | 6 (2) | 17,6 | 49,1 |
| <b>Exacerbaciones</b>                                                                                                                                                                                |       |      |      |
| 53. La telemonitorización domiciliar de los pacientes con EPOC debe incluir los resultados de la medida diaria con <i>peak flow</i> .                                                                | 6 (4) | 29,6 | 49,1 |
| 54. La telemonitorización domiciliar de los pacientes con EPOC debe incluir los resultados del MMRC.                                                                                                 | 8 (2) | 3,4  | 88,9 |
| 55. La telemonitorización domiciliar de los pacientes con EPOC debe incluir los datos de saturación de oxígeno.                                                                                      | 8 (2) | 0,9  | 90,6 |
| 56. La telemonitorización domiciliar de los pacientes con EPOC debe incluir registro de la actividad física.                                                                                         | 8 (2) | 0,0  | 94,0 |
| 57. La telemonitorización domiciliar de los pacientes con EPOC debe incluir el registro de utilización de medicación de rescate.                                                                     | 9 (1) | 0,0  | 97,4 |
| 58. La telemonitorización domiciliar de los pacientes con EPOC debe incluir el dato sobre color del esputo.                                                                                          | 9 (1) | 0,9  | 96,6 |
| 59. Las alarmas de telemonitorización de los pacientes con EPOC deben ser atendidas inicialmente por un profesional de Enfermería especializado.                                                     | 8 (2) | 10,3 | 76,9 |
| 60. Las alarmas de telemonitorización de los pacientes con EPOC deben ser atendidas inicialmente por un facultativo médico.                                                                          | 4 (5) | 49,1 | 25,9 |
| 61. La telemonitorización de exacerbaciones de los pacientes con EPOC debe iniciarse tras una exacerbación grave.                                                                                    | 7 (3) | 12,0 | 70,1 |

CAT: *COPD Assessment Test*; EPI: equipo de protección individual; EPOC: enfermedad pulmonar obstructiva crónica; FEV1: volumen espiratorio máximo en el primer segundo; FEV6: volumen espiratorio máximo en 6 segundos; GCI: glucocorticoides inhalados; IIQ: intervalo intercuartílico; MMRC: escala de disnea modificada del Medical Research Council; PCR: reacción en cadena de la polimerasa.

Verde: consenso en el acuerdo; Rojo: consenso en el desacuerdo; Blanco: Sin consenso.
